# Supplementary material for: Involvement of Ethylene in the Latex Metabolism and Tapping Panel Dryness of Hevea brasiliensis
Source: MDPI journal article supplement (doi:10.3390/ijms160817885), 2015-08-04
Supplement: s1 [file s1]

# Supplementary Information

| Gene                  | -Eth                |                       | +Eth                  |                       |
|-----------------------|---------------------|-----------------------|-----------------------|-----------------------|
|                       | Healthy             | TPD                   | Healthy               | TPD                   |
| ROS-scavenging system | <i>HbCuZnSOD</i>    | ND                    | ND                    | 2,42E-03 <sup>a</sup> |
|                       | <i>HbMnSOD</i>      | 6,35E-02 <sup>a</sup> | ND                    | 6,42E-03 <sup>a</sup> |
|                       | <i>HbGCL1</i>       | 1,01E-08 <sup>a</sup> | 1,05E-08 <sup>a</sup> | 1,02E-08 <sup>a</sup> |
|                       | <i>HbGCL2</i>       | 1,44E-01 <sup>a</sup> | 1,10E-01 <sup>a</sup> | 1,15E-01 <sup>a</sup> |
|                       | <i>HbAPX1</i>       | 1,01E-08 <sup>a</sup> | 1,05E-08 <sup>a</sup> | 1,02E-08 <sup>a</sup> |
|                       | <i>HbAPX2</i>       | 6,54E-02 <sup>a</sup> | 4,03E-02 <sup>a</sup> | ND                    |
|                       | <i>HbCAS1</i>       | ND                    | 2,48E-03 <sup>a</sup> | ND                    |
|                       | <i>HbCAS2</i>       | 1,01E-08 <sup>a</sup> | 1,05E-08 <sup>a</sup> | 1,02E-08 <sup>a</sup> |
|                       | <i>HbCAS3</i>       | 1,04E-01 <sup>a</sup> | ND                    | 5,05E-03 <sup>b</sup> |
|                       | <i>HbMDHAR</i>      | 1,55E-01 <sup>a</sup> | 1,94E-02 <sup>a</sup> | 2,25E-02 <sup>a</sup> |
|                       | <i>HbRbohA</i>      | 1,05E-03 <sup>a</sup> | 4,56E-03 <sup>a</sup> | 4,97E-04 <sup>a</sup> |
|                       | <i>HbRbohB</i>      | 6,30E-01 <sup>a</sup> | 1,24E+00 <sup>a</sup> | 2,71E-01 <sup>a</sup> |
|                       | <i>HbSAMS</i>       | 8,41E-05 <sup>a</sup> | 6,41E-06 <sup>b</sup> | 1,19E-05 <sup>b</sup> |
|                       | <i>HbACS1</i>       | 1,82E-03 <sup>a</sup> | 5,45E-03 <sup>a</sup> | 4,81E-03 <sup>a</sup> |
|                       | <i>HbACS2</i>       | ND                    | ND                    | 6,06E-05 <sup>a</sup> |
| Ethylene biosynthesis | <i>HbACS3</i>       | 1,42E-06 <sup>b</sup> | ND                    | 3,01E-04 <sup>a</sup> |
|                       | <i>HbACO1</i>       | 5,19E-04 <sup>a</sup> | 5,77E-04 <sup>a</sup> | 1,69E-04 <sup>b</sup> |
|                       | <i>HbACO2</i>       | 5,36E-03 <sup>a</sup> | 1,30E-02 <sup>a</sup> | 1,79E-03 <sup>a</sup> |
|                       | <i>HbACO3</i>       | 6,33E-05 <sup>a</sup> | ND                    | 6,74E-06 <sup>b</sup> |
|                       | <i>HbETR1</i>       | 3,52E-03 <sup>a</sup> | 6,58E-04 <sup>b</sup> | 1,21E-03 <sup>b</sup> |
|                       | <i>HbETR2</i>       | 8,07E+00 <sup>a</sup> | 1,46E+01 <sup>a</sup> | 4,17E+00 <sup>a</sup> |
|                       | <i>HbEIN2</i>       | 5,32E+00 <sup>a</sup> | 6,55E+00 <sup>a</sup> | 6,45E+00 <sup>a</sup> |
|                       | <i>HbEIN3</i>       | 1,17E-02 <sup>b</sup> | 1,42E-02 <sup>b</sup> | 1,20E-02 <sup>b</sup> |
|                       | <i>HbERF-1b4</i>    | 4,83E-03 <sup>b</sup> | ND                    | 8,07E-03 <sup>b</sup> |
|                       | <i>HbERF-1b7</i>    | 7,09E-03 <sup>b</sup> | 5,78E-03 <sup>b</sup> | 1,34E-02 <sup>b</sup> |
|                       | <i>HbERF-1b11</i>   | 6,02E-05 <sup>a</sup> | ND                    | 3,38E-04 <sup>a</sup> |
|                       | <i>HbERF-11b2</i>   | 7,14E-03 <sup>b</sup> | 6,51E-02 <sup>a</sup> | 2,34E-02 <sup>a</sup> |
|                       | <i>HbERF-11b1</i>   | 4,12E-04 <sup>a</sup> | 2,90E-04 <sup>a</sup> | 1,61E-04 <sup>a</sup> |
|                       | <i>HbERF-11e1</i>   | 1,30E-04 <sup>a</sup> | 6,75E-06 <sup>a</sup> | 1,07E-04 <sup>a</sup> |
|                       | <i>HbERF-1Va3</i>   | 1,01E-02 <sup>a</sup> | 5,94E-03 <sup>a</sup> | 1,10E-02 <sup>a</sup> |
| Ethylene signalling   | <i>HbERF-Va2</i>    | 9,06E-03 <sup>a</sup> | 6,07E-02 <sup>a</sup> | 3,79E-03 <sup>a</sup> |
|                       | <i>HbERF-V11</i>    | 4,27E-03 <sup>a</sup> | 3,50E-03 <sup>a</sup> | 4,41E-03 <sup>a</sup> |
|                       | <i>HbERF-V13</i>    | 3,07E-03 <sup>a</sup> | 1,26E-03 <sup>a</sup> | 1,10E-03 <sup>a</sup> |
|                       | <i>HbERF-V15</i>    | 9,73E-04 <sup>b</sup> | ND                    | 1,82E-03 <sup>b</sup> |
|                       | <i>HbERF-V1-L3</i>  | 1,35E-02 <sup>a</sup> | 1,12E-02 <sup>a</sup> | 4,05E-03 <sup>a</sup> |
|                       | <i>HbERF-V1-L4</i>  | 7,39E-02 <sup>b</sup> | 6,91E-02 <sup>b</sup> | 3,93E-02 <sup>b</sup> |
|                       | <i>HbERF-V11a1</i>  | ND                    | 2,15E-03 <sup>a</sup> | 1,08E-03 <sup>a</sup> |
|                       | <i>HbERF-V11a12</i> | 3,19E-03 <sup>a</sup> | 1,89E-03 <sup>a</sup> | 1,97E-03 <sup>a</sup> |
|                       | <i>HbERF-V11a20</i> | 1,35E-01 <sup>a</sup> | 1,85E-01 <sup>a</sup> | 8,48E-02 <sup>a</sup> |
|                       | <i>HbERF-V11a4</i>  | 4,09E+00 <sup>a</sup> | 5,12E+00 <sup>a</sup> | 2,51E+00 <sup>a</sup> |
|                       | <i>HbERF-V11a8</i>  | 5,69E-01 <sup>a</sup> | 1,56E+00 <sup>a</sup> | 2,48E-01 <sup>a</sup> |
|                       | <i>HbERF-V11a9</i>  | 6,99E-01 <sup>b</sup> | 1,17E+00 <sup>a</sup> | 2,47E-01 <sup>a</sup> |
|                       | <i>HbERF-V11a10</i> | 1,23E-02 <sup>b</sup> | 1,93E-02 <sup>b</sup> | 9,33E-03 <sup>b</sup> |
|                       | <i>HbERF-V11a12</i> | 2,57E-03 <sup>a</sup> | 1,26E-03 <sup>a</sup> | 1,06E-03 <sup>a</sup> |
|                       | <i>HbERF-V11a13</i> | 7,89E-03 <sup>a</sup> | 2,05E-02 <sup>a</sup> | 1,95E-02 <sup>a</sup> |
|                       | <i>HbERF-V11a14</i> | 7,23E-03 <sup>b</sup> | 2,16E-04 <sup>a</sup> | 1,29E-02 <sup>b</sup> |
|                       | <i>HbERF-V11b1</i>  | 8,84E-03 <sup>a</sup> | 1,18E-02 <sup>a</sup> | 2,20E-03 <sup>a</sup> |
|                       | <i>HbERF-IXa3</i>   | 5,66E-03 <sup>a</sup> | 7,32E-03 <sup>a</sup> | 6,29E-03 <sup>a</sup> |
|                       | <i>HbERF-IXb1</i>   | 5,32E+00 <sup>a</sup> | 7,88E-02 <sup>a</sup> | 9,66E-03 <sup>a</sup> |
|                       | <i>HbERF-IXb2</i>   | 8,44E-03 <sup>b</sup> | 5,49E-02 <sup>a</sup> | 2,11E-03 <sup>a</sup> |
|                       | <i>HbERF-IXb3</i>   | 2,45E-04 <sup>a</sup> | 1,90E-04 <sup>a</sup> | 7,71E-05 <sup>a</sup> |
|                       | <i>HbERF-IXc1</i>   | 4,46E-03 <sup>a</sup> | 3,80E-03 <sup>a</sup> | 2,64E-03 <sup>a</sup> |
|                       | <i>HbERF-IXc4</i>   | 1,02E-01 <sup>b</sup> | 7,44E-02 <sup>b</sup> | 4,72E-01 <sup>a</sup> |
|                       | <i>HbERF-IXc5</i>   | 8,42E-05 <sup>a</sup> | 2,11E-05 <sup>a</sup> | 1,50E-04 <sup>a</sup> |
|                       | <i>HbERF-IXc6</i>   | 6,84E-04 <sup>a</sup> | 7,78E-04 <sup>a</sup> | 2,78E-04 <sup>a</sup> |
|                       | <i>HbERF-Xa2</i>    | 1,99E-02 <sup>a</sup> | 5,75E-02 <sup>a</sup> | 6,05E-02 <sup>a</sup> |
|                       | <i>HbERF-Xa8</i>    | 4,10E-03 <sup>a</sup> | ND                    | 4,78E-03 <sup>a</sup> |
|                       | <i>HbERF-Xb1</i>    | 6,30E-03 <sup>b</sup> | 1,54E-02 <sup>b</sup> | 8,07E-03 <sup>a</sup> |
|                       | <i>HbAP2-1</i>      | 3,77E-04 <sup>a</sup> | 1,44E-04 <sup>a</sup> | 1,38E-04 <sup>a</sup> |
|                       | <i>HbAP2-3</i>      | 2,50E-02 <sup>a</sup> | 5,10E-02 <sup>a</sup> | 2,49E-02 <sup>a</sup> |
|                       | <i>HbAP2-5</i>      | 1,62E-03 <sup>a</sup> | 9,42E-04 <sup>a</sup> | 8,53E-04 <sup>a</sup> |
|                       | <i>HbAP2-6</i>      | 1,71E+00 <sup>a</sup> | 1,69E+00 <sup>a</sup> | 7,43E-02 <sup>a</sup> |
|                       | <i>HbAP2-7</i>      | 5,97E-03 <sup>a</sup> | 7,79E-03 <sup>a</sup> | 2,92E-03 <sup>a</sup> |
|                       | <i>HbAP2-8</i>      | 2,24E-03 <sup>a</sup> | 1,46E-03 <sup>a</sup> | 2,85E-04 <sup>a</sup> |
|                       | <i>HbAP2-9</i>      | 3,02E-02 <sup>a</sup> | 4,31E-02 <sup>a</sup> | 1,69E-03 <sup>a</sup> |
|                       | <i>HbAP2-10</i>     | 2,63E-02 <sup>a</sup> | 1,17E-02 <sup>b</sup> | 1,14E-02 <sup>b</sup> |
|                       | <i>HbAP2-11</i>     | 5,46E-03 <sup>a</sup> | 9,34E-03 <sup>a</sup> | 1,08E-03 <sup>a</sup> |
|                       | <i>HbAP2-13</i>     | 2,17E-03 <sup>a</sup> | 4,51E-03 <sup>a</sup> | 4,30E-04 <sup>a</sup> |
|                       | <i>HbAP2-15</i>     | 8,80E-03 <sup>a</sup> | 5,43E-03 <sup>a</sup> | 2,51E-03 <sup>a</sup> |
|                       | <i>HbRAF-4</i>      | 3,52E-04 <sup>a</sup> | 7,45E-04 <sup>a</sup> | 1,43E-04 <sup>a</sup> |

**Figure S1.** Relative transcript abundance profile of 70 genes of *Hevea brasiliensis* involved in ROS-scavenging system, ethylene biosynthesis and signalling during the occurrence of Tapping Panel Dryness in latex of 6-year-old mature trees. The relative transcript abundance was measured by real-time RT-PCR. Tapping without ethephon (–Eth) and with ethephon (+Eth) were applied in both studied tissues. Values are the means of three biological replicates. Heat map representation was used for values ranging as follows  $\geq 1$ ,  $10^{-1}$ ,  $10^{-2}$ ,  $10^{-3}$  and  $\leq 10^{-4}$  from dark to light green. Values of relative transcript abundances were analysed with XLSTAT after LOG(X) transformation. The statistical analysis was performed with an ANOVA followed by the Student Newman–Keuls test.

|                       | Gene                | -Eth                   |                        | +Eth                   |                        |
|-----------------------|---------------------|------------------------|------------------------|------------------------|------------------------|
|                       |                     | Healthy                | TPD                    | Healthy                | TPD                    |
| ROS-scavenging system | <i>HbCuZnSOD</i>    | 3.48E-04 <sup>a</sup>  | 8.15E-05 <sup>ab</sup> | 2.11E-05 <sup>b</sup>  | 3.17E-05 <sup>b</sup>  |
|                       | <i>HbMnSOD</i>      | 2.27E+00 <sup>a</sup>  | 3.12E+00 <sup>a</sup>  | 1.11E+00 <sup>b</sup>  | 1.41E+00 <sup>b</sup>  |
|                       | <i>HbGCL1</i>       | 1.83E-02 <sup>a</sup>  | 2.25E-02 <sup>ab</sup> | 5.54E-02 <sup>a</sup>  | 7.36E-02 <sup>ab</sup> |
|                       | <i>HbGCL2</i>       | 1.03E-01 <sup>a</sup>  | 1.48E-01 <sup>a</sup>  | 1.21E-01 <sup>a</sup>  | 1.08E-01 <sup>a</sup>  |
|                       | <i>HbAPX1</i>       | 5.32E+00 <sup>a</sup>  | 4.94E+00 <sup>ab</sup> | 3.43E+00 <sup>b</sup>  | 3.98E+00 <sup>b</sup>  |
|                       | <i>HbAPX2</i>       | 1.16E-02 <sup>a</sup>  | 1.33E-02 <sup>a</sup>  | 7.17E-03 <sup>a</sup>  | 9.35E-03 <sup>a</sup>  |
|                       | <i>HbCAS1</i>       | 2.79E-03 <sup>a</sup>  | 2.50E-03 <sup>bc</sup> | 8.43E-03 <sup>a</sup>  | 1.96E-02 <sup>b</sup>  |
|                       | <i>HbCAS2</i>       | 6.86E-03 <sup>a</sup>  | 7.48E-03 <sup>a</sup>  | 4.46E-02 <sup>a</sup>  | 1.05E-01 <sup>b</sup>  |
|                       | <i>HbCAS3</i>       | 2.49E-01 <sup>a</sup>  | 2.34E-01 <sup>bc</sup> | 1.43E+00 <sup>a</sup>  | 2.59E+00 <sup>ab</sup> |
|                       | <i>HbMDHAR</i>      | 1.70E-02 <sup>a</sup>  | 1.81E-02 <sup>bc</sup> | 2.92E-02 <sup>ab</sup> | 2.43E-02 <sup>a</sup>  |
|                       | <i>HbRbohA</i>      | 3.45E-01 <sup>a</sup>  | 2.56E-01 <sup>ab</sup> | 1.85E-01 <sup>b</sup>  | 1.86E-01 <sup>b</sup>  |
|                       | <i>HbRbohB</i>      | 2.05E-01 <sup>a</sup>  | 2.11E-01 <sup>a</sup>  | 1.56E-01 <sup>a</sup>  | 1.97E-01 <sup>a</sup>  |
| Ethylene biosynthesis | <i>HbSAMS</i>       | 1.84E-01 <sup>a</sup>  | 8.98E-02 <sup>a</sup>  | 3.86E-01 <sup>a</sup>  | 1.58E-01 <sup>a</sup>  |
|                       | <i>HbACS1</i>       | 2.25E-02 <sup>a</sup>  | 3.43E-02 <sup>a</sup>  | 1.71E-02 <sup>a</sup>  | 4.76E-03 <sup>a</sup>  |
|                       | <i>HbACS2</i>       | 6.93E-03 <sup>a</sup>  | 9.11E-03 <sup>a</sup>  | 3.37E-03 <sup>a</sup>  | 1.38E-02 <sup>a</sup>  |
|                       | <i>HbACS3</i>       | 2.49E-03 <sup>a</sup>  | 7.11E-03 <sup>a</sup>  | 3.05E-03 <sup>b</sup>  | 2.74E-03 <sup>b</sup>  |
|                       | <i>HbACO1</i>       | 6.16E-04 <sup>a</sup>  | 3.23E-03 <sup>a</sup>  | 2.20E-04 <sup>a</sup>  | 1.26E-04 <sup>a</sup>  |
|                       | <i>HbACO2</i>       | 3.39E-01 <sup>b</sup>  | 3.77E-01 <sup>b</sup>  | 1.30E+00 <sup>a</sup>  | 2.33E+00 <sup>ab</sup> |
|                       | <i>HbACO3</i>       | 3.45E-03 <sup>a</sup>  | 1.29E-02 <sup>a</sup>  | 1.67E-03 <sup>a</sup>  | 2.47E-03 <sup>a</sup>  |
|                       | <i>HbETR1</i>       | 9.23E-02 <sup>a</sup>  | 7.34E-02 <sup>a</sup>  | 4.83E-02 <sup>a</sup>  | 5.69E-02 <sup>a</sup>  |
|                       | <i>HbETR2</i>       | 1.07E+00 <sup>a</sup>  | 1.41E+00 <sup>a</sup>  | 4.64E-01 <sup>b</sup>  | 6.34E-01 <sup>bc</sup> |
|                       | <i>HbEIN2</i>       | 4.46E-01 <sup>a</sup>  | 4.57E-01 <sup>a</sup>  | 2.65E-01 <sup>a</sup>  | 3.41E-01 <sup>a</sup>  |
|                       | <i>HbEIN3</i>       | 1.97E+00 <sup>a</sup>  | 2.04E+00 <sup>a</sup>  | 1.42E+00 <sup>a</sup>  | 1.21E+00 <sup>a</sup>  |
|                       | <i>HbERF-Ib4</i>    | 2.42E+00 <sup>a</sup>  | 3.87E-01 <sup>a</sup>  | 9.97E-02 <sup>a</sup>  | 1.95E-01 <sup>a</sup>  |
|                       | <i>HbERF-Ib7</i>    | 2.16E+02 <sup>a</sup>  | 2.19E-01 <sup>a</sup>  | 3.67E-01 <sup>a</sup>  | 4.19E-01 <sup>a</sup>  |
|                       | <i>HbERF-Ib11</i>   | 6.50E-04 <sup>a</sup>  | 9.11E-05 <sup>a</sup>  | 1.82E-04 <sup>a</sup>  | 2.30E-04 <sup>a</sup>  |
| Ethylene signalling   | <i>HbERF-Ib12</i>   | 2.01E-04 <sup>a</sup>  | 8.82E-05 <sup>a</sup>  | 5.57E-04 <sup>a</sup>  | 1.37E-03 <sup>a</sup>  |
|                       | <i>HbERF-IIIb1</i>  | 1.34E+00 <sup>a</sup>  | 9.82E-04 <sup>a</sup>  | 1.05E-04 <sup>a</sup>  | 1.25E-03 <sup>a</sup>  |
|                       | <i>HbERF-IIIe1</i>  | 1.90E-02 <sup>a</sup>  | 8.41E-03 <sup>a</sup>  | 1.60E-03 <sup>b</sup>  | 1.98E-03 <sup>b</sup>  |
|                       | <i>HbERF-IVa3</i>   | 1.57E-02 <sup>a</sup>  | 1.10E-02 <sup>a</sup>  | 1.77E-03 <sup>a</sup>  | 1.38E-02 <sup>a</sup>  |
|                       | <i>HbERF-Va2</i>    | 3.60E-02 <sup>a</sup>  | 2.89E-02 <sup>a</sup>  | 3.62E-03 <sup>b</sup>  | 2.13E-03 <sup>b</sup>  |
|                       | <i>HbERF-VI1</i>    | 6.05E-04 <sup>a</sup>  | 6.38E-04 <sup>a</sup>  | 3.72E-05 <sup>a</sup>  | 2.91E+01 <sup>a</sup>  |
|                       | <i>HbERF-VI3</i>    | 4.70E-03 <sup>a</sup>  | 2.86E-03 <sup>a</sup>  | 8.02E-03 <sup>a</sup>  | 5.50E+00 <sup>a</sup>  |
|                       | <i>HbERF-VI5</i>    | 4.13E-02 <sup>a</sup>  | 6.00E-02 <sup>a</sup>  | 1.52E-02 <sup>a</sup>  | 3.26E-02 <sup>a</sup>  |
|                       | <i>HbERF-VI-L3</i>  | 4.25E-02 <sup>a</sup>  | 5.47E-02 <sup>a</sup>  | 5.09E-02 <sup>a</sup>  | 1.56E-01 <sup>a</sup>  |
|                       | <i>HbERF-VI-L4</i>  | 8.33E-03 <sup>a</sup>  | 1.79E-02 <sup>a</sup>  | 3.92E-03 <sup>a</sup>  | 1.40E-02 <sup>a</sup>  |
|                       | <i>HbERF-VIIa1</i>  | 3.14E-02 <sup>a</sup>  | 1.18E-01 <sup>a</sup>  | 2.78E-03 <sup>b</sup>  | 4.41E-03 <sup>b</sup>  |
|                       | <i>HbERF-VIIa12</i> | 1.76E-02 <sup>a</sup>  | 2.89E-02 <sup>a</sup>  | 1.68E-03 <sup>ab</sup> | 8.15E-03 <sup>b</sup>  |
|                       | <i>HbERF-VIIa20</i> | 5.16E-02 <sup>a</sup>  | 3.42E-01 <sup>a</sup>  | 2.53E-02 <sup>a</sup>  | 1.35E+00 <sup>a</sup>  |
|                       | <i>HbERF-VIIa4</i>  | 1.59E-01 <sup>b</sup>  | 1.55E-01 <sup>b</sup>  | 1.60E-01 <sup>a</sup>  | 4.31E-01 <sup>b</sup>  |
|                       | <i>HbERF-VIIa8</i>  | 4.16E-01 <sup>a</sup>  | 4.32E-01 <sup>a</sup>  | 1.29E-01 <sup>b</sup>  | 1.06E-01 <sup>b</sup>  |
|                       | <i>HbERF-VIIa9</i>  | 6.34E-02 <sup>a</sup>  | 7.54E-02 <sup>a</sup>  | 5.83E-02 <sup>a</sup>  | 3.86E-02 <sup>a</sup>  |
|                       | <i>HbERF-VIIa10</i> | 1.60E-01 <sup>b</sup>  | 1.30E-01 <sup>b</sup>  | 3.16E-01 <sup>a</sup>  | 1.20E+00 <sup>ab</sup> |
|                       | <i>HbERF-VIIa12</i> | 6.04E-01 <sup>a</sup>  | 7.92E-01 <sup>a</sup>  | 3.56E-01 <sup>a</sup>  | 2.20E-01 <sup>a</sup>  |
|                       | <i>HbERF-VIIa13</i> | 1.16E-01 <sup>ab</sup> | 1.81E-01 <sup>a</sup>  | 6.96E-02 <sup>b</sup>  | 6.91E-02 <sup>b</sup>  |
|                       | <i>HbERF-VIIa14</i> | 6.91E-02 <sup>a</sup>  | 8.29E-02 <sup>a</sup>  | 4.83E-02 <sup>a</sup>  | 6.23E-02 <sup>a</sup>  |
|                       | <i>HbERF-VIIIb1</i> | 1.59E-04 <sup>a</sup>  | 3.41E-04 <sup>a</sup>  | 1.56E+00 <sup>a</sup>  | 8.34E-05 <sup>a</sup>  |
|                       | <i>HbERF-IXa3</i>   | 4.70E-02 <sup>a</sup>  | 7.97E-02 <sup>a</sup>  | 5.39E-02 <sup>a</sup>  | 9.24E-02 <sup>a</sup>  |
|                       | <i>HbERF-IXb1</i>   | 4.75E-02 <sup>a</sup>  | 3.08E-01 <sup>a</sup>  | 3.56E-02 <sup>a</sup>  | 4.45E-02 <sup>a</sup>  |
|                       | <i>HbERF-IXb2</i>   | 4.50E-03 <sup>ab</sup> | 8.88E-02 <sup>a</sup>  | 1.69E-03 <sup>ab</sup> | 4.21E-03 <sup>b</sup>  |
|                       | <i>HbERF-IXb3</i>   | 2.04E-03 <sup>a</sup>  | 1.81E-03 <sup>a</sup>  | 2.90E-03 <sup>a</sup>  | 9.29E-03 <sup>a</sup>  |
|                       | <i>HbERF-IXc1</i>   | 1.53E-01 <sup>a</sup>  | 2.48E-01 <sup>a</sup>  | 8.10E-02 <sup>a</sup>  | 1.71E-01 <sup>a</sup>  |
|                       | <i>HbERF-IXc4</i>   | 2.80E-02 <sup>a</sup>  | 9.80E-02 <sup>a</sup>  | 4.50E-02 <sup>a</sup>  | 2.13E-01 <sup>a</sup>  |
|                       | <i>HbERF-IXc5</i>   | 7.34E-03 <sup>b</sup>  | 1.19E-02 <sup>ab</sup> | 3.05E-02 <sup>a</sup>  | 6.65E-02 <sup>ab</sup> |
|                       | <i>HbERF-IXc6</i>   | 1.77E-02 <sup>a</sup>  | 4.36E-02 <sup>a</sup>  | 6.78E-02 <sup>a</sup>  | 6.51E-02 <sup>a</sup>  |
|                       | <i>HbERF-Xa2</i>    | 4.72E-02 <sup>a</sup>  | 3.69E-02 <sup>a</sup>  | 9.49E-02 <sup>a</sup>  | 1.27E-01 <sup>a</sup>  |
|                       | <i>HbERF-Xa8</i>    | 5.11E-04 <sup>b</sup>  | 3.21E-04 <sup>b</sup>  | 9.19E-04 <sup>a</sup>  | 3.12E-03 <sup>b</sup>  |
|                       | <i>HbERF-Xb1</i>    | 3.89E-04 <sup>a</sup>  | 2.98E-04 <sup>a</sup>  | 3.47E-04 <sup>a</sup>  | 7.66E-04 <sup>a</sup>  |
|                       | <i>HbAP2-1</i>      | 7.16E-05 <sup>a</sup>  | 3.79E-05 <sup>ab</sup> | 1.02E-08 <sup>b</sup>  | 3.21E-05 <sup>c</sup>  |
|                       | <i>HbAP2-3</i>      | 7.22E-04 <sup>a</sup>  | 4.81E-04 <sup>a</sup>  | 8.89E-04 <sup>a</sup>  | 1.41E-03 <sup>a</sup>  |
|                       | <i>HbAP2-5</i>      | 4.37E-03 <sup>a</sup>  | 1.48E-03 <sup>a</sup>  | 2.09E-03 <sup>a</sup>  | 1.89E-03 <sup>a</sup>  |
|                       | <i>HbAP2-6</i>      | 1.26E-02 <sup>a</sup>  | 6.33E-03 <sup>a</sup>  | 1.05E-02 <sup>a</sup>  | 1.86E-02 <sup>a</sup>  |
|                       | <i>HbAP2-7</i>      | 3.35E-03 <sup>a</sup>  | 2.08E-03 <sup>a</sup>  | 1.68E-04 <sup>b</sup>  | 1.94E-04 <sup>b</sup>  |
|                       | <i>HbAP2-8</i>      | 1.14E-02 <sup>a</sup>  | 5.92E-03 <sup>ab</sup> | 1.16E-03 <sup>ab</sup> | 3.38E-03 <sup>b</sup>  |
|                       | <i>HbAP2-9</i>      | 7.95E-02 <sup>a</sup>  | 1.51E-01 <sup>a</sup>  | 4.07E-02 <sup>a</sup>  | 4.57E-02 <sup>a</sup>  |
|                       | <i>HbAP2-10</i>     | 1.38E-02 <sup>a</sup>  | 4.63E-03 <sup>a</sup>  | 1.76E-03 <sup>a</sup>  | 6.40E-03 <sup>b</sup>  |
|                       | <i>HbAP2-11</i>     | 5.23E-04 <sup>a</sup>  | 3.89E-04 <sup>a</sup>  | 1.39E-04 <sup>a</sup>  | 3.33E-04 <sup>a</sup>  |
|                       | <i>HbAP2-13</i>     | 1.88E-04 <sup>a</sup>  | 1.57E-04 <sup>a</sup>  | 2.25E-05 <sup>ab</sup> | 1.07E-04 <sup>b</sup>  |
|                       | <i>HbAP2-15</i>     | 7.85E-03 <sup>a</sup>  | 6.07E-03 <sup>a</sup>  | 8.14E-04 <sup>b</sup>  | 5.77E-04 <sup>b</sup>  |
|                       | <i>HbRAV-4</i>      | 5.77E-05 <sup>a</sup>  | 1.47E-04 <sup>a</sup>  | 3.00E-05 <sup>a</sup>  | 3.08E-05 <sup>a</sup>  |

**Figure S2.** Relative transcript abundance profile of 70 genes of *Hevea brasiliensis* involved in ROS-scavenging system, ethylene biosynthesis and signalling during the occurrence of Tapping Panel Dryness in bark of 6-year-old mature trees. The relative transcript abundance was measured by real-time RT-PCR. Tapping without ethephon (–Eth) and with ethephon (+Eth) were applied in both studied tissues. Values are the means of three biological replicates. Heat map representation was used for values ranging as follows  $\geq 1$ ,  $10^{-1}$ ,  $10^{-2}$ ,  $10^{-3}$  and  $\leq 10^{-4}$  from dark to light green. Values of relative transcript abundances were analysed with XLSTAT after LOG(X) transformation. The statistical analysis was performed with an ANOVA followed by the Student Newman–Keuls test.
